# Supplementary material for: A self-supported porous NiMo electrocatalyst to boost the catalytic activity in the hydrogen evolution reaction
Source: Royal Society of Chemistry journal article supplement (doi:10.1039/d4dt00508b), 2024-01-01
Supplement: d4dt00508b1.pdf [file d4dt00508b1.pdf]

## Supporting information

### Self-supported Porous NiMo Electrocatalyst to Boost the Catalytic Activity of Hydrogen Evolution Reaction

*Qingxiang Kong<sup>a,b</sup>, Yulei Li<sup>b</sup>, Qin Zhao<sup>b</sup>, Zhenwei Liu<sup>b</sup>, Song Wu<sup>b</sup>, Xiaoning Tong<sup>b</sup>,*

*Junli Wang<sup>c</sup>, Bangfu Huang<sup>b</sup>, Ruidong Xu<sup>a,b\*</sup>, Linjing Yang<sup>a,b\*</sup>*

*<sup>a</sup> State Key Laboratory of Complex Nonferrous Metal Resources Clean Utilization, Kunming University of Science and Technology, Kunming 650093, China*

*<sup>b</sup> Faculty of Metallurgical and Energy Engineering, Kunming University of Science and Technology, Kunming 650093, China*

*<sup>c</sup> Research Center for Analysis and Measurement, Kunming University of Science and Technology, Kunming 650093, China*

---

\* E-mail addresses: [rdxupaper@aliyun.com](mailto:rdxupaper@aliyun.com) (R. Xu), [eslinjingyang@kust.edu.cn](mailto:eslinjingyang@kust.edu.cn) (L. Yang).

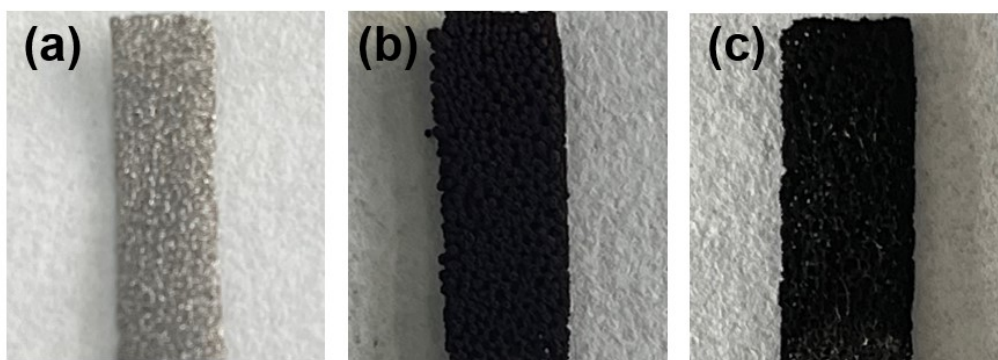

**Fig. S1.** Optical images of (a) NF array (b) Ni/NF array, and NiMo/Ni/NF array. The NiMo/Ni/NF array is darker than the NF array.

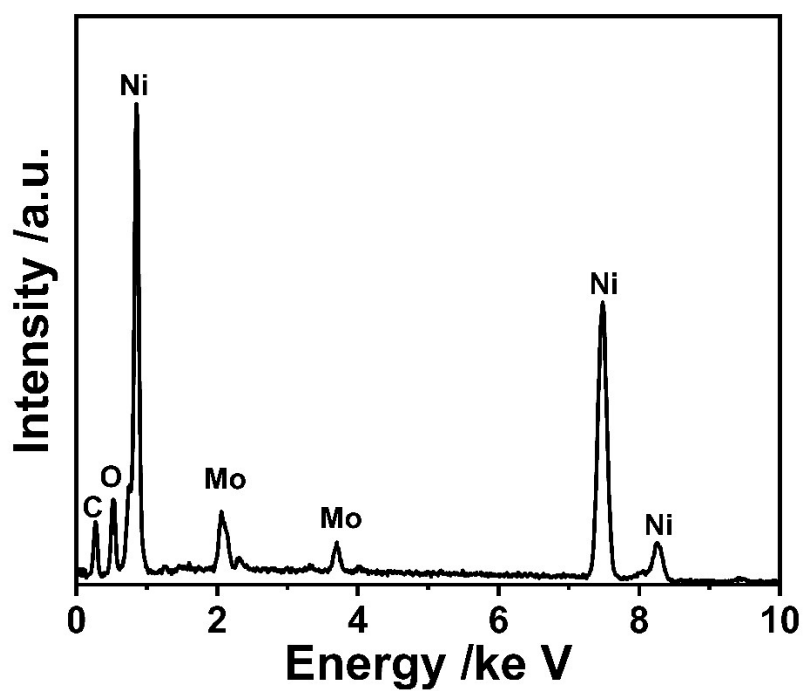

**Fig. S2.** EDS analysis spectra of NiMo/Ni/NF.

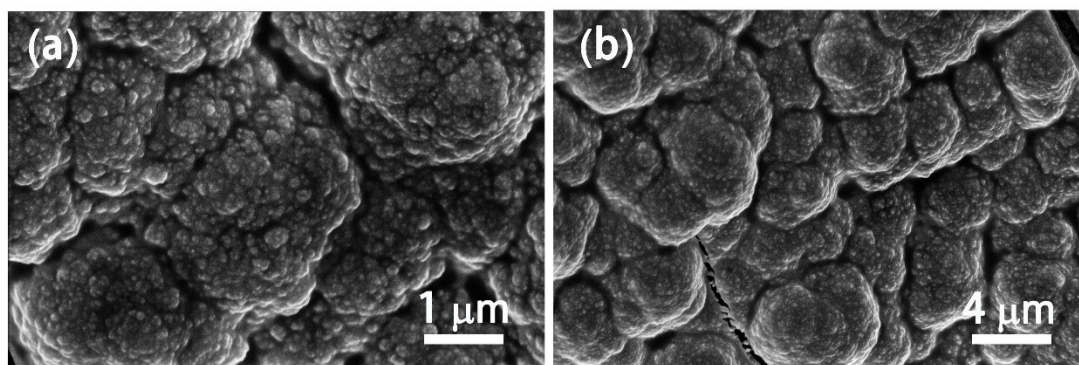

**Fig. S3.** SEM images of NiMo/NF.

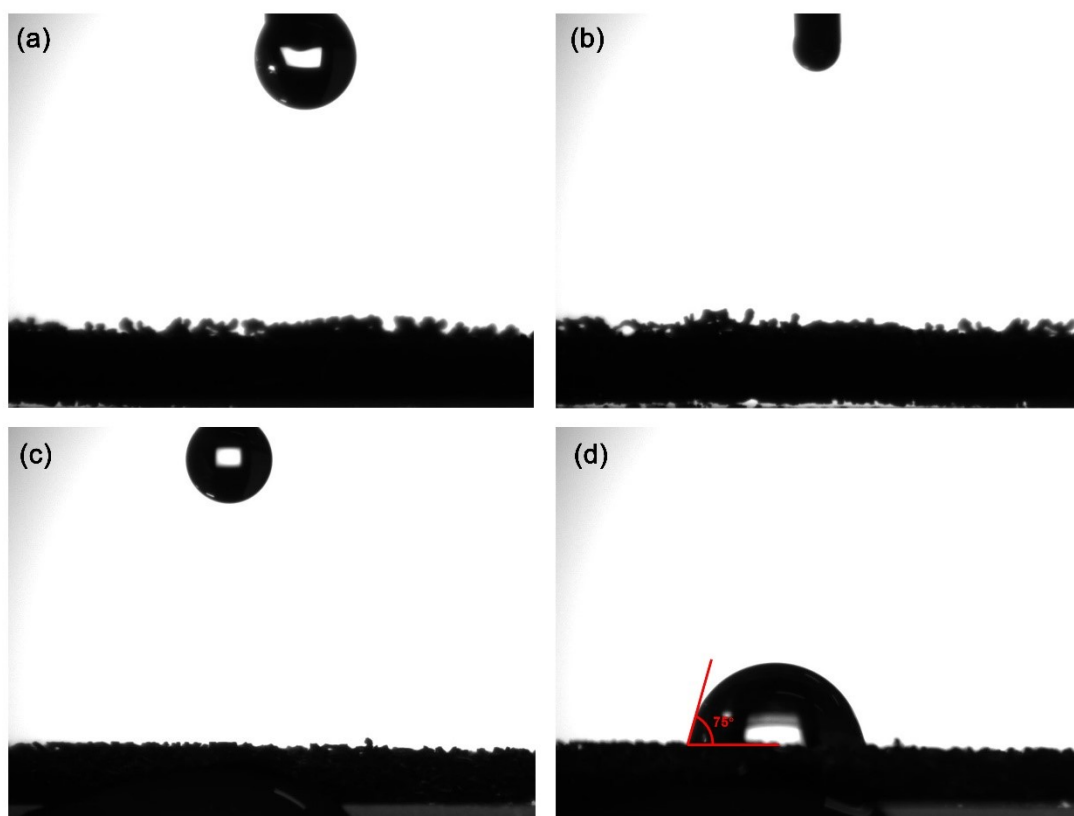

**Fig. S4.** Surface wettability of the NiMo/Ni/NF (a,b) and the NF (c,d).

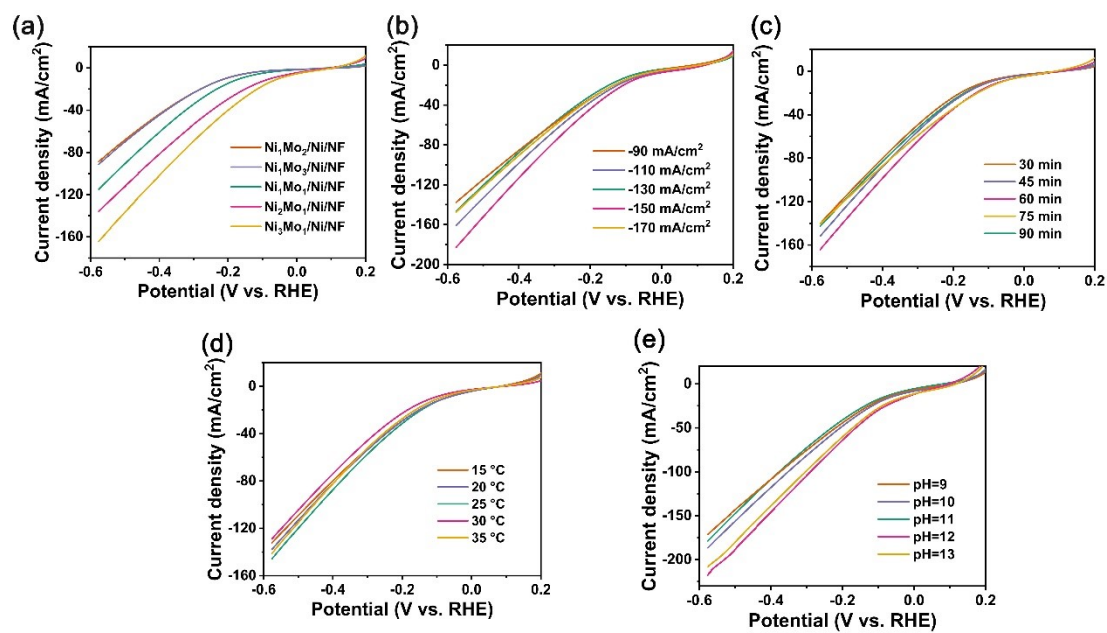

**Fig. S5.** The HER LSV curves of NiMo/Ni/NF in different (a) concentration of Ni and Mo (mM) (b) electrodeposition current density, (c) electrodeposition temperature time, (d) electrodeposition temperature, and (e) electrodeposition pH.

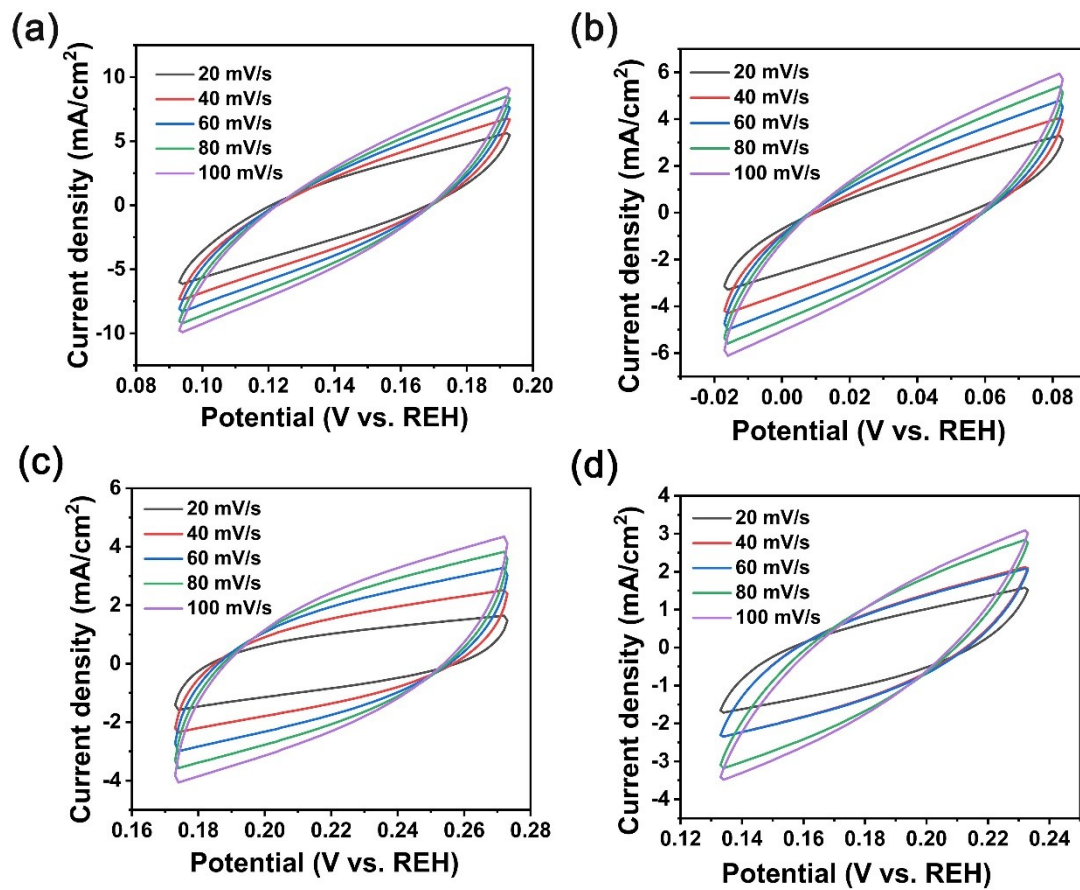

**Fig. S6.** Cyclic voltammograms (CVs) at different scan rates of the prepared samples.

a NiMo/Ni/NF, b NiMo/NF, c Ni/NF, d NF.

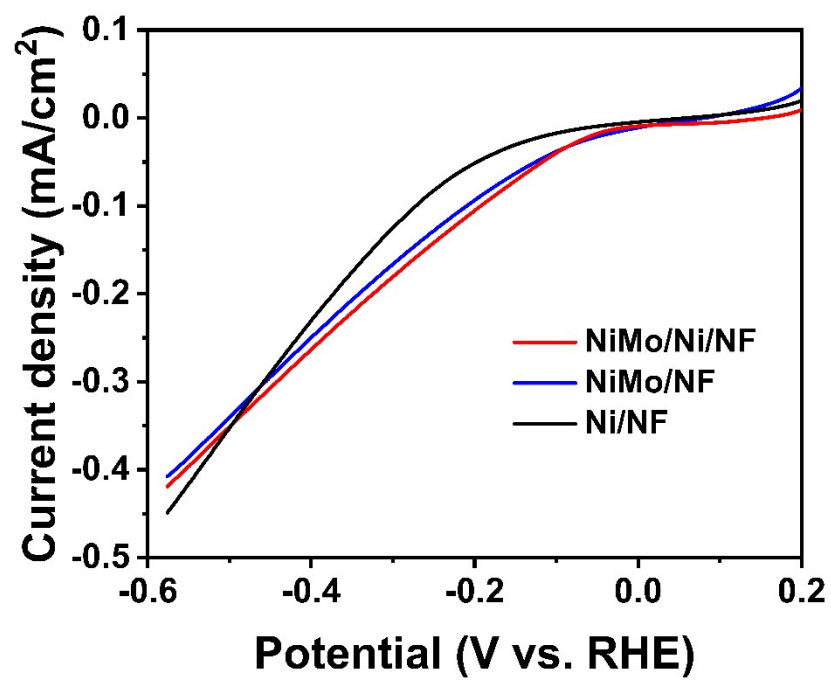

**Fig. S7.** HER polarization curves for NiMo/Ni/NF, NiMo/NF, and NF, normalized by electrical surface area (ECSA).

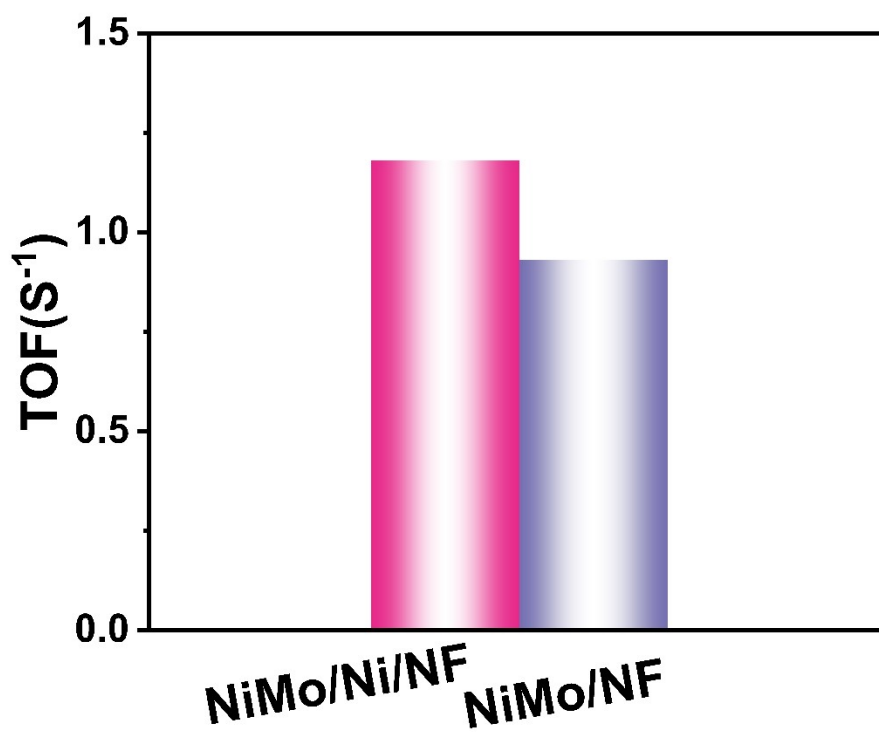

Fig. S8. TOF plots.

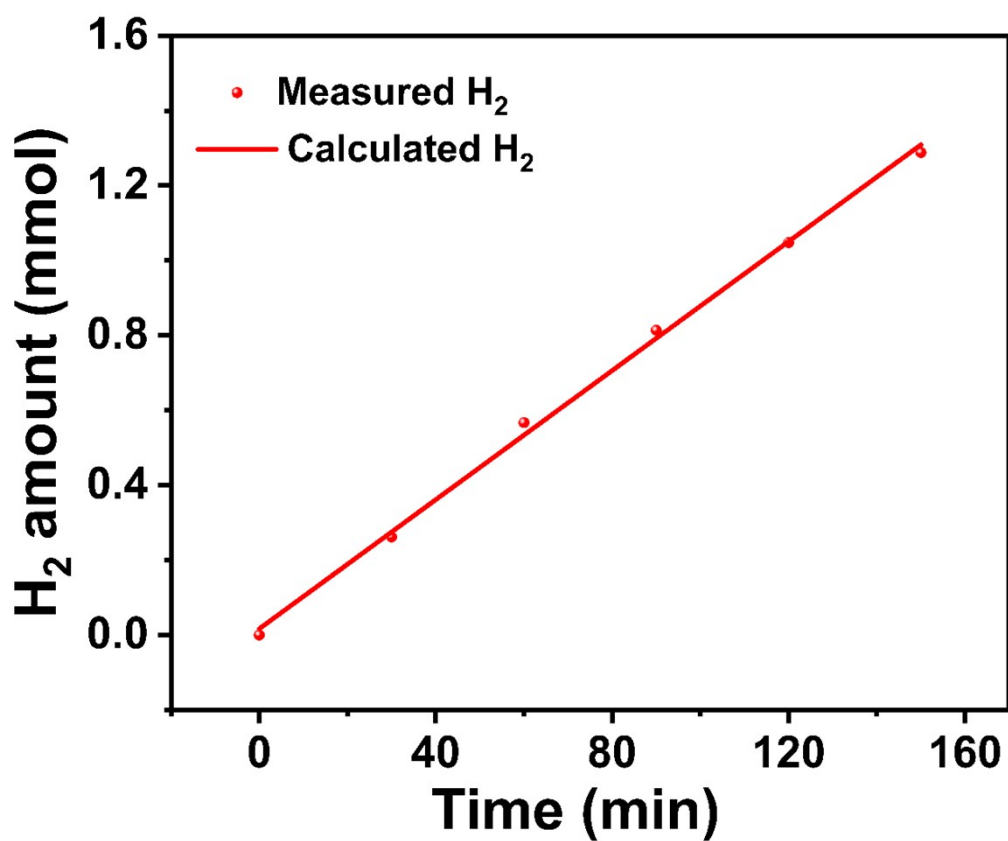

Fig. S9. Faradaic efficiency measurement of NiMo/Ni/NF.

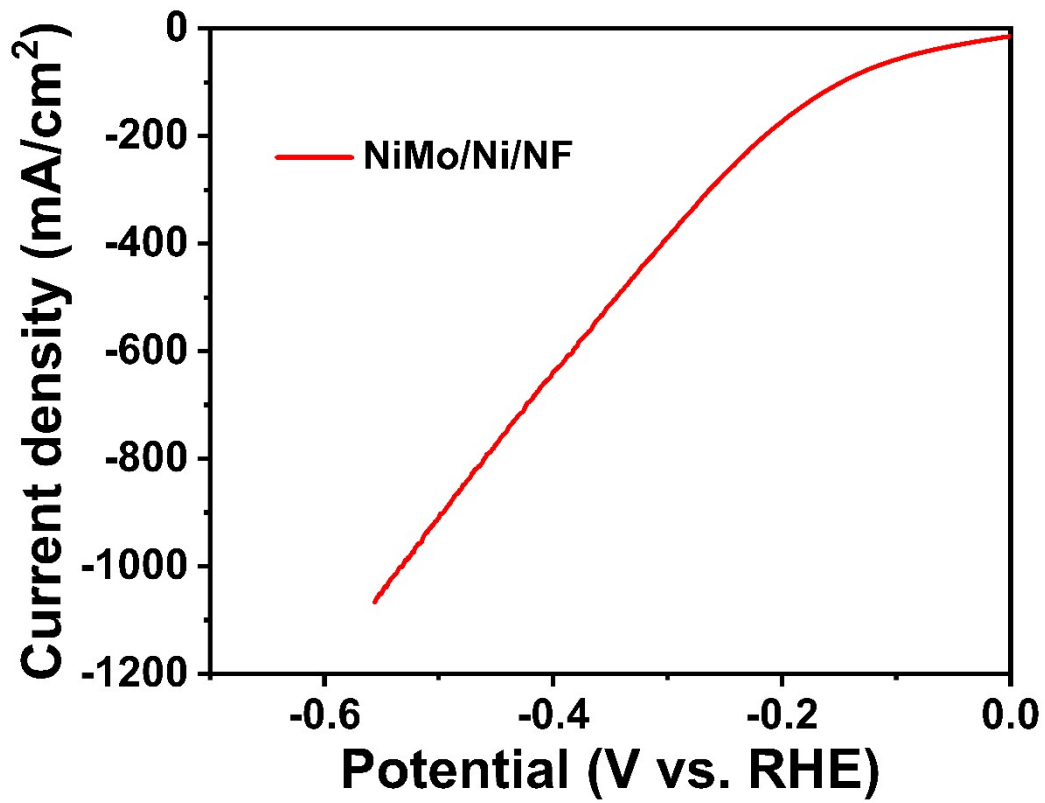

Fig. S10. LSV plots.

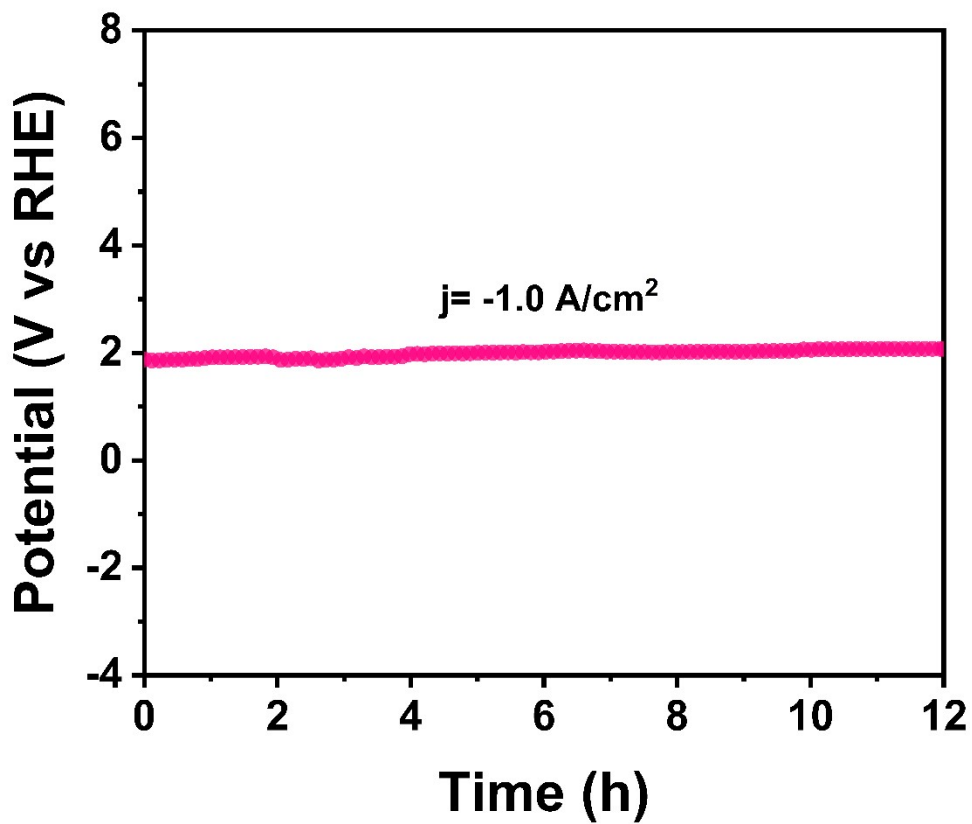

Fig. S11. Stability test plots.



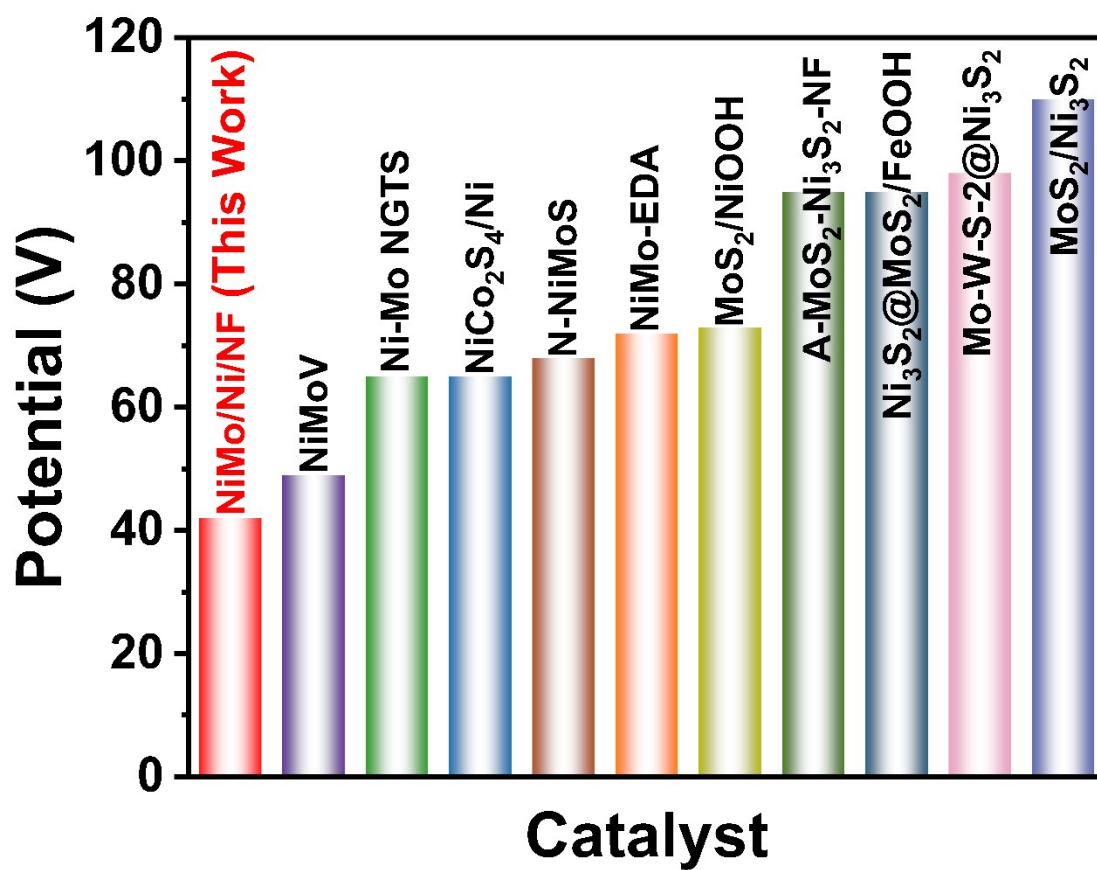

Fig. S12. Comparison of the voltage @ 10 mA/cm<sup>2</sup> of recently reported in various electrocatalysts.

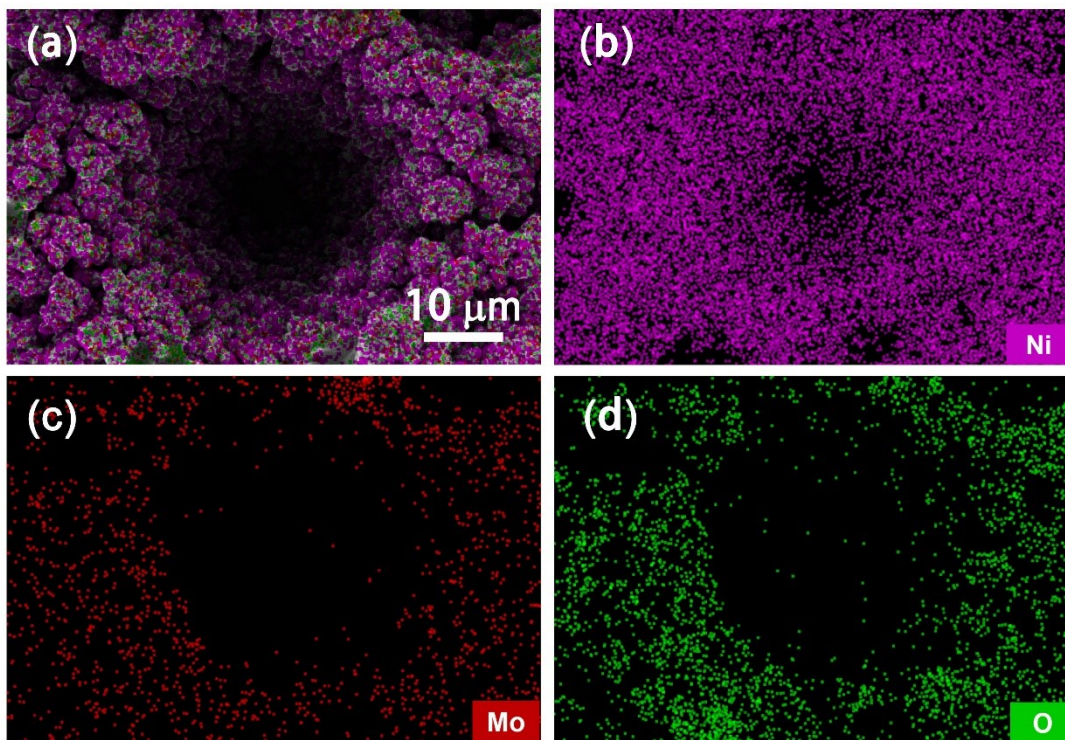

**Fig. S13.** Corresponding EDX mapping images of the NiMo/Ni/NF after the HER stability test for 70 h.

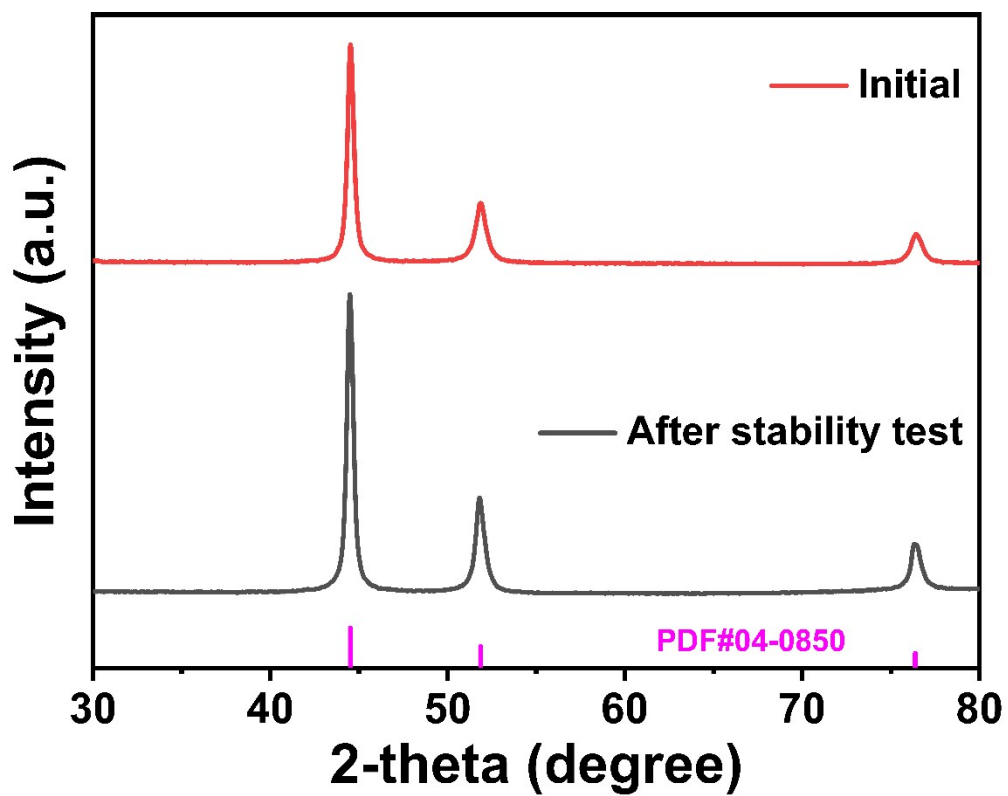

**Fig. S14.** XRD spectra comparison of fresh NiMo/Ni/NF electrocatalyst and NiMo/Ni/NF electrocatalysts after the HER stability tests.

**Table S1.** Comparison of the potentials at 10 mA cm<sup>-2</sup> with recently reported HER catalysts

| Catalyst                                                | Electrolyte | Overpotential (mV) at 10 mA cm <sup>-2</sup> | Tafel slope (mV dec <sup>-1</sup> ) | Reference |
|---------------------------------------------------------|-------------|----------------------------------------------|-------------------------------------|-----------|
| NiMo/Ni/NF                                              | 1.0 M KOH   | 42                                           | 44                                  | This work |
| N-NiMoS                                                 |             | 68                                           | 86                                  | 1         |
| Ni <sub>3</sub> S <sub>2</sub> @MoS <sub>2</sub> /FeOOH |             | 95                                           | 85                                  | 2         |
| MoS <sub>2</sub> /NiOOH                                 |             | 73                                           | 75                                  | 3         |
| NiMo-EDA                                                |             | 72                                           | 89                                  | 4         |
| MoS <sub>2</sub> /Ni <sub>3</sub> S <sub>2</sub>        |             | 110                                          | 83                                  | 5         |
| NiMoV                                                   |             | 49                                           | 48.3                                | 6         |
| A-MoS <sub>2</sub> -Ni <sub>3</sub> S <sub>2</sub> -NF  |             | 95                                           | 107.5                               | 7         |
| Mo-W-S <sub>2</sub> @Ni <sub>3</sub> S <sub>2</sub>     |             | 98                                           | 92                                  | 8         |
| Ni-Mo NGTS                                              |             | 65                                           | 67                                  | 9         |
| NiCo <sub>2</sub> S <sub>4</sub> /Ni                    |             | 65                                           | 84.5                                | 10        |

## Reference

1. C. Huang, L. Yu, W. Zhang, Q. Xiao, J. Zhou, Y. Zhang, P. An, J. Zhang and Y. Yu, *Appl. Catal. B*, 2020, **276**, 119137.
2. Y. Li, K. Dastafkan, Q. Sun, Y. Ma, X. Wang, X. Yang, Z. Wang and C. Zhao, *Electrochim. Acta*, 2021, **379**, 138042.
3. X. Zhang and Y. Liang, *Adv. Sci.*, 2018, **5**, 1700644.
4. W. Gao, W. Gou, X. Zhou, J. G. Ho, Y. Ma and Y. Qu, *ACS Appl. Mater. Interfaces*, 2018, **10**, 1728-1733.
5. J. Zhang, T. Wang, D. Pohl, B. Rellinghaus, R. Dong, S. Liu, X. Zhuang and X. Feng, *Angew. Chem. Int. Ed.*, 2016, **55**, 6702-6707.
6. Y. Lin, D. Ding, S. Zhu, Q. Wen, H. Li, Z. Li, Y. Liu and Y. Shen, *Nano Res.*, 2023, **17**, 1232–1241.
7. M. Hu, Y. Qian, S. Yu, Q. Yang, Z. Wang, Y. Huang and L. Li, *Small*, 2024, **20**, 2305948.
8. M. Zheng, J. Du, B. Hou and C.-L. Xu, *ACS Appl. Mater. Interfaces*, 2017, **9**, 26066-26076.
9. T. Wang, Y. Guo, Z. Zhou, X. Chang, J. Zheng and X. Li, *Acs Nano*, 2016, **10**, 10397-10403.
10. L. Ma, Y. Hu, R. Chen, G. Zhu, T. Chen, H. Lv, Y. Wang, J. Liang, H. Liu, C. Yan, H. Zhu, Z. Tie, Z. Jin and J. Liu, *Nano Energy*, 2016, **24**, 139-147.
